# Supplementary material for: Patterned growth of ultra long carbon nanotubes. Properties and systematic investigation into their growth process
Source: Royal Society of Chemistry journal article supplement (doi:10.1039/b919579c), 2010-01-01

**Supplementary information**

**SI-1:**

Supplementary  
information for

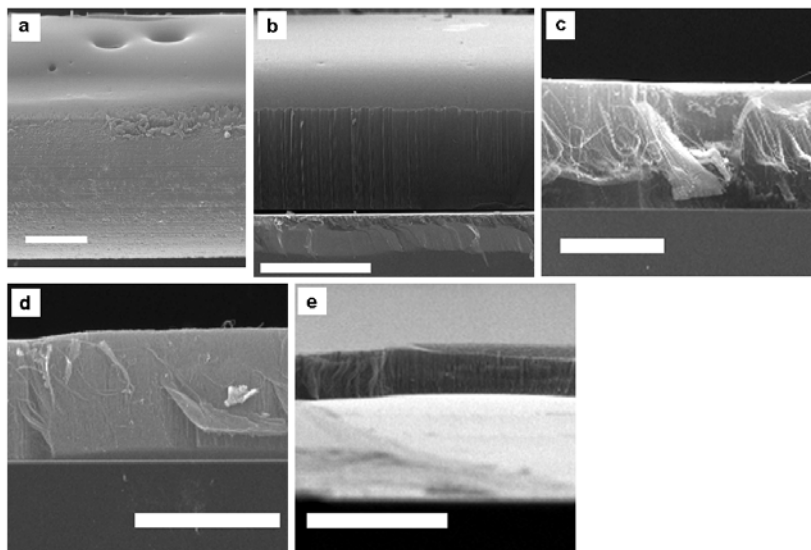

figure 3.

Figure 1: SEM micrographs of Height of CNT films grown for certain Hydrogen or water concentrations marked in figure 3. (Data bar for SEM micrographs a and b is 200 $\mu$ m and 100 $\mu$ m for c,d and e)

**SI-2:** Supplementary information showing SEM (a) and AFM (b) micrographs of Catalyst particles formed on Si wafer after heating up Al and Fe film on it.

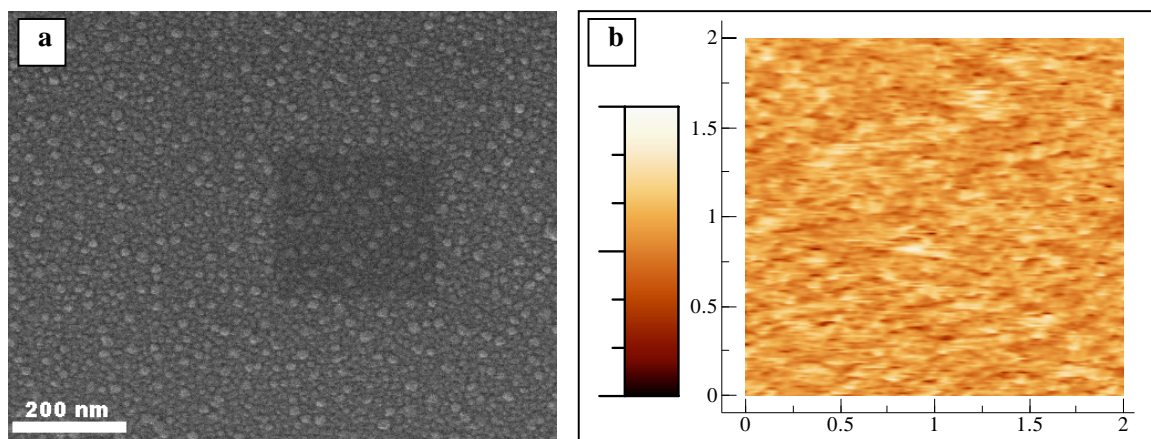

Supplement: b919579c.pdf [file b919579c.pdf]
